# Supplementary material for: Topically Applied Bacteriophage to Control Multi-Drug Resistant Klebsiella pneumoniae Infected Wound in a Rat Model
Source: MDPI journal article supplement (doi:10.3390/antibiotics10091048), 2021-08-27
Supplement: s1 [file s1]

## Article

# Topically Applied Bacteriophage to Control Multi-Drug Resistant *Klebsiella pneumoniae* Infected Wound in a Rat Model

Mohamed S. Fayez <sup>1</sup>, Toka A. Hakim <sup>2</sup>, Mona M. Agwa <sup>3</sup>, Mohamed Abdelmoteleb <sup>4</sup>, Rania G. Aly <sup>5</sup>,  
Nada N. Montaser <sup>2</sup>, Abdallah S. Abdelsattar <sup>1,6</sup>, Nouran Rezk <sup>1</sup> and Ayman El-Shibiny <sup>1,7,\*</sup>

Table S1. Genome annotation of the ZCKP8 genome.

| ORF number | Strand | Frame | CDS position | Translation | Best annotated protein                  |
|------------|--------|-------|--------------|-------------|-----------------------------------------|
| ORF1       | +      | 3     | 312..497     | 186   61    | Hypothetical protein                    |
| ORF2       | +      | 3     | 513..791     | 279   92    | Hypothetical protein                    |
| ORF3       | +      | 3     | 798..1181    | 384   127   | Hypothetical protein                    |
| ORF4       | +      | 2     | 1178..1462   | 285   94    | Hypothetical protein                    |
| ORF5       | +      | 1     | 1315..1818   | 504   167   | Hypothetical protein                    |
| ORF6       | +      | 3     | 1818..1946   | 129   42    | Hypothetical protein                    |
| ORF7       | +      | 1     | 1894..2802   | 909   302   | Hypothetical protein                    |
| ORF8       | +      | 3     | 2895..3053   | 159   52    | Hypothetical protein                    |
| ORF9       | +      | 2     | 3053..3208   | 156   51    | Hypothetical protein                    |
| ORF10      | +      | 3     | 3489..3908   | 420   139   | Hypothetical protein                    |
| ORF11      | +      | 2     | 4028..5470   | 1443   480  | Large terminase subunit                 |
| ORF12      | +      | 2     | 5870..6109   | 240   79    | Hypothetical protein                    |
| ORF13      | +      | 1     | 6106..6258   | 153   50    | Hypothetical protein                    |
| ORF14      | +      | 3     | 6267..6455   | 189   62    | Hypothetical protein                    |
| ORF15      | +      | 2     | 6455..6676   | 222   73    | Hypothetical protein                    |
| ORF16      | +      | 1     | 6673..6873   | 201   66    | Hypothetical protein                    |
| ORF17      | +      | 1     | 6883..7128   | 246   81    | Hypothetical protein                    |
| ORF18      | +      | 3     | 7176..8570   | 1395   464  | Portal (connector) protein              |
| ORF19      | +      | 1     | 8548..9360   | 813   270   | Hypothetical protein                    |
| ORF20      | +      | 2     | 9341..10288  | 948   315   | head decoration protein                 |
| ORF21      | +      | 1     | 11803..12240 | 438   145   | Lysozyme                                |
| ORF22      | +      | 3     | 12237..12482 | 246   81    | Putative holin                          |
| ORF23      | +      | 1     | 12457..12951 | 495   164   | Tail protein                            |
| ORF24      | +      | 2     | 12635..12904 | 270   89    | Outer-membrane spanin protein           |
| ORF25      | +      | 3     | 14460..14675 | 216   71    | Hypothetical protein                    |
| ORF26      | +      | 2     | 14759..14950 | 192   63    | Hypothetical protein                    |
| ORF27      | +      | 1     | 14947..15171 | 225   74    | Hypothetical protein                    |
| ORF28      | +      | 3     | 15168..15404 | 237   78    | Zinc-binding domain of primase-helicase |
| ORF29      | +      | 1     | 15358..15864 | 507   168   | Hypothetical protein                    |
| ORF30      | +      | 3     | 15852..16142 | 291   96    | Hypothetical protein                    |
| ORF31      | +      | 3     | 16143..16487 | 345   114   | Hypothetical protein                    |
| ORF32      | +      | 2     | 16502..16654 | 153   50    | Hypothetical protein                    |
| ORF33      | +      | 2     | 16670..18070 | 1401   466  | Hypothetical protein                    |
| ORF34      | +      | 1     | 18070..18534 | 465   154   | Capsid decoration protein               |
| ORF35      | +      | 3     | 18546..19634 | 1089   362  | Major coat protein                      |
| ORF36      | +      | 3     | 19677..19871 | 195   64    | Hypothetical protein                    |
| ORF37      | +      | 2     | 19901..20731 | 831   276   | Hypothetical protein                    |
| ORF38      | +      | 2     | 23456..23743 | 288   95    | Hypothetical protein                    |
| ORF39      | +      | 3     | 23652..24113 | 462   153   | Hypothetical protein                    |
| ORF40      | +      | 2     | 24110..24244 | 135   44    | Hypothetical protein                    |
| ORF41      | +      | 1     | 24232..24576 | 345   114   | Hypothetical protein                    |
| ORF42      | +      | 1     | 24580..24996 | 417   138   | Hypothetical protein                    |
| ORF43      | +      | 3     | 24993..25376 | 384   127   | Hypothetical protein                    |
| ORF44      | +      | 1     | 25828..25917 | 90   29     | Hypothetical protein                    |
| ORF45      | +      | 1     | 25990..26742 | 753   250   | Major tail subunit                      |
| ORF46      | +      | 1     | 28402..29109 | 708   235   | Hypothetical protein                    |
| ORF47      | +      | 3     | 29109..32402 | 3294   1097 | Tail length tape measure protein        |
| ORF48      | +      | 2     | 32402..32872 | 471   156   | Minor tail protein                      |
| ORF49      | +      | 1     | 32872..33342 | 471   156   | Hypothetical protein                    |

|       |   |   |              |            |                                     |
|-------|---|---|--------------|------------|-------------------------------------|
| ORF50 | + | 2 | 33305..33754 | 450   149  | Tail assembly protein               |
| ORF51 | + | 3 | 33702..36182 | 2481   826 | Putative tail protein               |
| ORF52 | + | 2 | 36212..38704 | 2493   830 | Tail fiber protein                  |
| ORF53 | + | 1 | 45379..46332 | 954   317  | DNA primase                         |
| ORF54 | - | 2 | 5781..5491   | 291   96   | Hypothetical protein                |
| ORF55 | - | 1 | 10423..10301 | 123   40   | Hypothetical protein                |
| ORF56 | - | 2 | 11286..10423 | 864   287  | Hypothetical protein                |
| ORF57 | - | 3 | 11414..11283 | 132   43   | Hypothetical protein                |
| ORF58 | - | 1 | 11704..11414 | 291   96   | Hypothetical protein                |
| ORF59 | - | 1 | 13225..13010 | 216   71   | Hypothetical protein                |
| ORF60 | - | 2 | 13359..13228 | 132   43   | Hypothetical protein                |
| ORF61 | - | 3 | 13580..13356 | 225   74   | Hypothetical protein                |
| ORF62 | - | 1 | 13969..13580 | 390   129  | Hypothetical protein                |
| ORF63 | - | 3 | 14363..14163 | 201   66   | Holin                               |
| ORF64 | - | 2 | 20943..20761 | 183   60   | Hypothetical protein                |
| ORF65 | - | 3 | 21524..20946 | 579   192  | DNA polymerase III beta subunit     |
| ORF66 | - | 1 | 21655..21479 | 177   58   | Hypothetical protein                |
| ORF67 | - | 2 | 21999..21652 | 348   115  | Hypothetical protein                |
| ORF68 | - | 3 | 22850..21999 | 852   283  | Putative transcriptional regulator  |
| ORF69 | - | 2 | 22938..22822 | 117   38   | Hypothetical protein                |
| ORF70 | - | 3 | 23243..22935 | 309   102  | Hypothetical protein                |
| ORF71 | - | 1 | 25621..25523 | 99   32    | Hypothetical protein                |
| ORF72 | - | 2 | 27450..26782 | 669   222  | Gp42                                |
| ORF73 | - | 3 | 27701..27450 | 252   83   | Hypothetical protein                |
| ORF74 | - | 1 | 28183..27698 | 486   161  | HNH-endonuclease                    |
| ORF75 | - | 3 | 28319..28170 | 150   49   | Hypothetical protein                |
| ORF76 | - | 1 | 33457..33311 | 147   48   | Hypothetical protein                |
| ORF77 | - | 1 | 39481..38978 | 504   167  | Single-stranded DNA-binding protein |
| ORF78 | - | 1 | 40528..39491 | 1038   345 | Hypothetical protein                |
| ORF79 | - | 3 | 41780..40824 | 957   318  | Exonuclease                         |
| ORF80 | - | 1 | 42226..41783 | 444   147  | Hypothetical protein                |
| ORF81 | - | 2 | 42690..42274 | 417   138  | Hypothetical protein                |
| ORF82 | - | 1 | 44584..42677 | 1908   635 | DNA helicase                        |
| ORF83 | - | 1 | 45331..45179 | 153   50   | Hypothetical protein                |
| ORF84 | - | 2 | 45366..44593 | 774   257  | Putative endonuclease protein       |
| ORF85 | - | 1 | 46579..46346 | 234   77   | Hypothetical protein                |
| ORF86 | - | 2 | 48132..46576 | 1557   518 | Hypothetical protein                |
| ORF87 | - | 3 | 48365..48129 | 237   78   | Hypothetical protein                |
